# Supplementary material for: Adapting the eHealth Literacy Scale for Carers of People With Chronic Diseases (eHeals-Carer) in a Sample of Greek and Cypriot Carers of People With Dementia: Reliability and Validation Study
Source: PubMed Central journal article supplement (PMC6908974; doi:10.2196/12504), 2019-11-28
Supplement: jmir_v21i11e12504_app1.pdf [file jmir_v21i11e12504_app1.pdf]

Multimedia Appendix  
Scoping Review Flow Chart

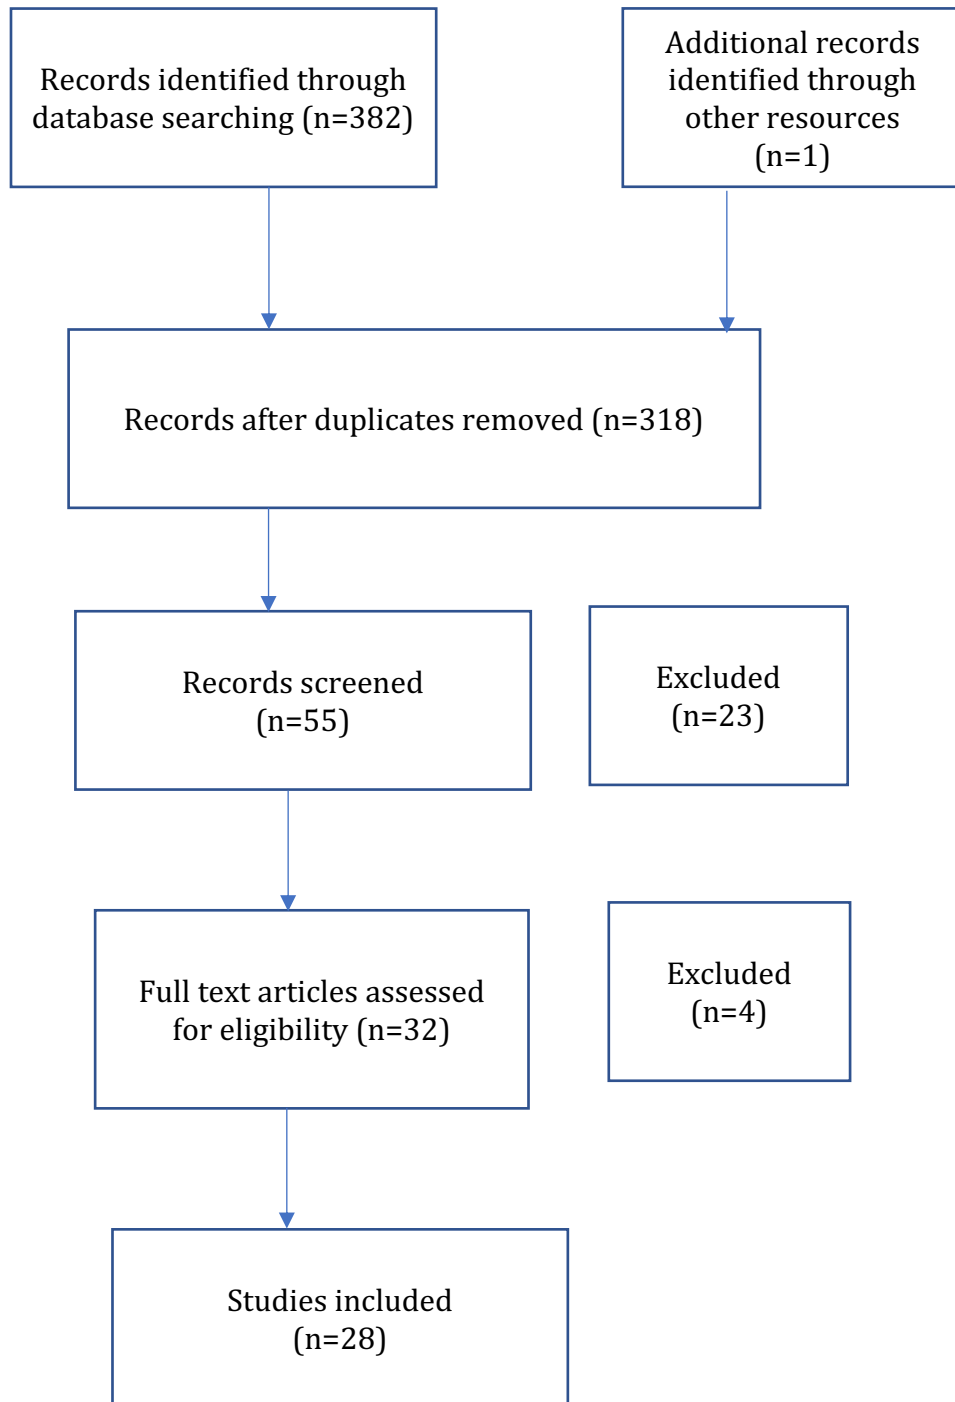

This is a Multimedia Appendix to a full manuscript published in the J Med Internet Res.  
For full copyright and citation information see <http://dx.doi.org/10.2196/jmir.12504>
