# Supplementary material for: Adapting the eHealth Literacy Scale for Carers of People With Chronic Diseases (eHeals-Carer) in a Sample of Greek and Cypriot Carers of People With Dementia: Reliability and Validation Study
Source: PubMed Central journal article supplement (PMC6908974; doi:10.2196/12504), 2019-11-28
Supplement: jmir_v21i11e12504_app2.pdf [file jmir_v21i11e12504_app2.pdf]

## Multimedia Appendix "Scoping review results of eHeals"

| Authors                                                  | number of items                                                                                                                                                                                                    | aim                                                                                                                 | language | reliability                                                                                                                 | dimensions                                                                          | sample                                                                                                        | recruitment process                                                                                                            | scoring                                                                                         |
|----------------------------------------------------------|--------------------------------------------------------------------------------------------------------------------------------------------------------------------------------------------------------------------|---------------------------------------------------------------------------------------------------------------------|----------|-----------------------------------------------------------------------------------------------------------------------------|-------------------------------------------------------------------------------------|---------------------------------------------------------------------------------------------------------------|--------------------------------------------------------------------------------------------------------------------------------|-------------------------------------------------------------------------------------------------|
| 1 Norman & Skinner, 2006a [24]                           | 8 items (+ internet use questions), self-administered                                                                                                                                                              | to assess eHealth literacy in wide population                                                                       | English  | Cronbach alpha =.88,intra-class correlation in test retest reliability = .49 (modest stability over time)                   | 1 factor (PCA)                                                                      | 664 adolescents (age 13-21)                                                                                   | single session randomised intervention trial                                                                                   | 5-point Likert scale, perceived skills (high - low reference not specific categories)           |
| 2 Van Der Vaart et al, 2011 [25]                         | 8 items (+ in study 1, general and health related internet use and in study 2: general internet use and performance test), administration way not defined                                                          | reliability and construct validity of a Dutch version                                                               | Dutch    | Study 1: Cronbach alpha=.93<br>Study 2:Cronbach alpha=.92                                                                   | Study 1 & 2: 1 factor (PCA)                                                         | Study 1: 227 people with rheumatic diseases, mean age 52, Study 2: 88 people, general population, mean age 43 | Study 1: randomised sample by patient database<br>Study 2: random recruitment by random dialing numbers                        | 5-point Likert scale, Study 1: mean sum score: 28.2 , SD=5.9<br>study 2: mean sum: 27.6, SD=5.9 |
| 3 Koo et al (2012) [30]                                  | 8 items, self-administered                                                                                                                                                                                         | validation of eHeals to Chinese school children                                                                     | Chinese  | Cronbach alpha=.92, assessment of concurrent validity                                                                       | 1 factor (PCA)                                                                      | 219 six graders School children                                                                               | single group cross sectional study, part of a larger study                                                                     | 5-point Likert scale , total score: 8 to 40 , mean score 28.4, SD=7.6)                          |
| 4 Mitsutake et al, 2011; Original Paper in Japanese [70] | 8 items, self-administered                                                                                                                                                                                         | N/A                                                                                                                 | Japanese | Cronbach alpha=.93                                                                                                          | 1 factor (CFA)                                                                      | 3000 participants                                                                                             | randomly selected                                                                                                              | 5-point Likert scale, total score: 8 to 40,                                                     |
| 5 Neter & Brainin, 2012 [31]                             | 6 items (+ internet access, digital literacy, health information sources, content, search strategies, evaluation criteria, perceived outcomes of health information search, perceived health), telephone interview | Assess levels of eHealth literacy among Israeli random population                                                   | Israeli  | Cronbach alpha=.86                                                                                                          | 1 factor (EFA/PCA)                                                                  | 4286 adults                                                                                                   | Random digital-dial telephone survey                                                                                           | 5-point Likert scale, mean 3.34 (SD .88), 2 groups (high level >3.4 and low level <3.4)         |
| 6 Soellner et al, 2014 [54]                              | 8 items (+ subscales of the Health competences questionnaire, self-efficacy scale, internet use as information source and time spent online), self-administered, paper and pencil survey                           | Validation of eHeals in German among adolescents                                                                    | German   | Cronbach alpha for dimension information seeking: .88 and for information appraisal .83                                     | 2 dimensions: information seeking (1-5 & 8) and information appraisal (6 & 7) (CFA) | 327 students with mean age 18.10                                                                              | administered as part of a larger study, cross sectional paper-pencil survey, Grade 12 class sessions in 4 Gymnasias in Cologne | 5-point Likert scale , Factor 1: 3.57 SD=.78, Factor 2: 3.70 SD=.96                             |
| 7 Paramio Perez et al, 2015 in Spanish [69]              | 8 items scale (+ well-being scales), self-administered                                                                                                                                                             | validation in Spanish                                                                                               | Spanish  | Cronbach alpha=.87                                                                                                          | 1 factor (EFA)                                                                      | 447 university students                                                                                       | Convenience sample                                                                                                             | 5-point Likert scale, total score: 8 to 40, high and low scores                                 |
| 8 Park & Lee, 2015 [55]                                  | 8 items (+ internet use and 2 supplementary items), self-administered online                                                                                                                                       | Assess levels of undergraduate nursing students in South Korea                                                      | Korean   | Cronbach alpha= .86                                                                                                         | n/A                                                                                 | 176 nursing undergraduate student between age 20-30                                                           | Convenience sample                                                                                                             | 5-point Likert scale, total score: 8 to 40, mean 27.06 SD=4.2 (high over 27 and low below 27)   |
| 9 Saffarzadeh, Aro, 2015 [53]                            | 8 items (+ health related internet use, internet use) self-administered paper and pencil                                                                                                                           | to explore health related internet use (use of high quality of websites and quality of the physician), the internal | English  | Cronbach alpha=.94, Cronbach alpha of items 3-5=.93, Cronbach alpha of items 6,7)=.88, Cronbach alpha of (items 8,9,10)=.82 | 1 Factor (PCA) 2 & 3 factors (Varimax rotation factor analysis)                     | 79 patients or their caregivers of Otorynology head and Neck Surgery                                          | Convenience sample                                                                                                             | 5-point Likert scale , 0-100 scale transformation, mean 66.3 (SD= 20.5)                         |
| 10 Chung & Nahm, 2015 [65]                               | 8 items, self-administered                                                                                                                                                                                         | Validate eHeals for older adults                                                                                    | English  | Cronbach alpha=.94                                                                                                          | 1 factor (EFA)                                                                      | 866 adults (mean age 62.8)                                                                                    | Original sample from Bone Power study. Online recruitment from Senior health and healthyVet                                    | 5-point Likert scale , total score: 8 to 40, mean 30.94 SD=6                                    |
| 11 Bazm et al, 2016 [56]                                 | 8 items (+ 10 questions to assess computer and internet skills), self-administered                                                                                                                                 | Validation of the Iranian version of eHeals                                                                         | Persian  | Cronbach alpha=.88                                                                                                          | 1 factor (PCA)                                                                      | 525 youth people                                                                                              | Randomly selected                                                                                                              | 5-point Likert scale , total score: 8 to 40, mean score not available                           |

|    |                                                |                                                                                                                                                                                                  |                                                                                                        |                                      |                                                                                                   |                                                                                                                                                                       |                                                                                                                                   |                                                                                       |                                                                                                                                                   |
|----|------------------------------------------------|--------------------------------------------------------------------------------------------------------------------------------------------------------------------------------------------------|--------------------------------------------------------------------------------------------------------|--------------------------------------|---------------------------------------------------------------------------------------------------|-----------------------------------------------------------------------------------------------------------------------------------------------------------------------|-----------------------------------------------------------------------------------------------------------------------------------|---------------------------------------------------------------------------------------|---------------------------------------------------------------------------------------------------------------------------------------------------|
| 12 | Nguyen et al, 2016 [68]                        | 8 items, self-administered                                                                                                                                                                       | to investigate the eHeals properties with RASCH modelling                                              | English                              | Study 1: Person reliability (equivalency of Cronbach alpha= .80. Study 2: Person reliability= .81 | study 1 & 2: 1 factor (EFA) Rasch modeling (rating scale analysis)                                                                                                    | Study 1: 164 undergraduate students (18-34-83.6%: 20-21) Study 2. 366 individuals 59% aged 18-32 years                            | 1. convenience sample 2. acquired by Amazon's Mechanical Turk (Mturk)                 | 5-point Likert scale, total score: 8 to 40, no mean score available                                                                               |
| 13 | Caro et al, 2016, only abstract available [57] | 8 items (+ 2 scales of self-esteem and life satisfaction), self-administered                                                                                                                     | validate in Italian                                                                                    | Italian                              | Cronbach alpha=.87, Test retest correlation=.78                                                   | 1 factor (EFA)                                                                                                                                                        | 650 university student (age 18-45)                                                                                                | N/A                                                                                   | 5-point Likert scale, total score: 8 to 40, high and low scores                                                                                   |
| 14 | Tubaishat & Habiballah, 2016 [58]              | 8 items (+ perceived level of internet skills, frequency of internet use, perceived usefulness of internet on health decisions, importance of health related internet access), self-administered | Assess the levels of ehealth literacy among nursing students in Jordan                                 | Arabic                               | Cronbach alpha=.81                                                                                | N/A                                                                                                                                                                   | 541 nursing students                                                                                                              | Discriptive cross sectional sample, Convenient sample                                 | 5-point Likert scale , high and low scores, mean= 3.62 SD=.58                                                                                     |
| 15 | Paige et al, 2017 [67]                         | 8 items scale, self-administered web based                                                                                                                                                       | Explore unidimensionality (1 factor) and reliability of the eHeals scale                               | English                              | Classical test: Cronbach alpha=.90, item response theory technique                                | 3 factor model (CFA) , 70% explained by factor 1, 9% and 5% by 2 and 3 and Partial Credit Model (PCM)                                                                 | 811 participants of online survey with cardiovascular disease, arthritis, mental health disorder, chronic lung disease and cancer | web based survey                                                                      | 5-point Likert scale , high and low scores, (mean =30.34 SD=5.30)                                                                                 |
| 16 | Stellefson et al, 2017 [59]                    | 8 items (+perceived health status and experience with social media platforms to access and share health information), self-administered                                                          | aiming to validate telephone version of eHeals for older adults, investigate 2 and 3 factor models     | English                              | exploratory structural equation modeling, and IRT analysis                                        | Exploratory structural equation modeling (PCM) : 3 factor model (2 of the 3 factors are correlated and provide evidence for unidimensional structure for older adults | 283 older adults                                                                                                                  | telephone survey: random digital dialing as part of Florida Consumer Confidence index | 5-point Likert scale, total score: 8 to 40, high and low scores, mean= 29.05 SD= 5.75                                                             |
| 17 | Diviani et al, 2017 [28]                       | 8 items (+ general and health related internet use), self-administered web based                                                                                                                 | validate in Italian                                                                                    | Italian                              | Cronbach alpha= .89 (Classic theory and Rasch modeling)                                           | 2 factor solution (PCA & CFA)                                                                                                                                         | 296 Italian speaking region of Switzerland                                                                                        | 2 surveys (summer 2013 and Spring 2015)                                               | 5-point Likert scale , total score: 8 to 40, high and low scores, (mean =26.65 SD= 6.28) , study 1: 27.21 SD= 6.083 and study 2: 26.27 SD= 6.388) |
| 18 | Sudbury-Riley et al, 2017 [52]                 | 8 items (+information and resources to cover the web 2.0 with use of social media, self-administered online                                                                                      | measurement invariance: measuring the same traits in different groups and investigate a 3 factor model | English (UK, new Zealand, USA)       | USA Cronbach alpha=.92, uk.93, new Zealand=.91                                                    | 3 factor structure: awareness (1,2), skills (3, 4,5) and evaluation (6, 7, 8), CFA                                                                                    | 996 baby boomers                                                                                                                  | random sample of 3 countries                                                          | 5-point Likert scale, table with mean item scores                                                                                                 |
| 19 | Dashti et al, 2017 [27]                        | 8 items (+ websites for health related information, frequency of internet use), self-administered                                                                                                | Assess the level of ehealth literacy among Medical science students, validation of the tool            | Persian                              | CVI (10 experts)Cronbach alpha = .89                                                              | 2 categories: Q1,2,3,4 AND Q 5,6,7,8 (EFA)                                                                                                                            | 192 Medical students                                                                                                              | Convenient sample                                                                     | 5-point Likert scale , total score: 8 to 40, high and low scores, (mean =28.21 SD= 6.95)                                                          |
| 20 | Richtering et al, 2017 [60]                    | 8 items (+ Health Literacy Questionnaire), self-administered online                                                                                                                              | Assess levels of eHealth literacy and health literacy among population with high cardiovascular risk   | English (Australia )                 | Rasch Modeling, PSI (internal constancy: 0.90)                                                    | Unidimensionality is not well supported- probable 2 concepts                                                                                                          | 392 participant of CONNECT study, a randomized control trial                                                                      | Randomized sample                                                                     | 5-point Likert scale , total score: 8 to 40, high and low scores, mean=27.1 SD=6.67                                                               |
| 21 | Islam et al, 2017 [61]                         | 8 items (+ computer knowledge and internet use, use of Web 2.0 for health information and perceived health), self-administered                                                                   | eHealth literacy levels in Southeast Asia                                                              | English (even If not clearly stated) | Cronbach alpha=.074                                                                               | 1 factor (EFA)                                                                                                                                                        | 199 students in Bangladesh                                                                                                        | Convenient Sample                                                                     | 5-point Likert scale , total score: 8 to 40, high and low scores, 5 point Likert scale (2 reverse questions)                                      |

|    |                           |                                                                                                                                   |                                                                                           |               |                                                                                                                                                                                                                                                                             |                                                                                                                                                   |                                                                        |                                                                                 |                                                                                                                                                                                                                                        |
|----|---------------------------|-----------------------------------------------------------------------------------------------------------------------------------|-------------------------------------------------------------------------------------------|---------------|-----------------------------------------------------------------------------------------------------------------------------------------------------------------------------------------------------------------------------------------------------------------------------|---------------------------------------------------------------------------------------------------------------------------------------------------|------------------------------------------------------------------------|---------------------------------------------------------------------------------|----------------------------------------------------------------------------------------------------------------------------------------------------------------------------------------------------------------------------------------|
| 22 | Petric et al, 2017 [50]   | 20 items extended version (+ users' activities), online self administration                                                       | eHealth literacy level among online health communities and Development of extended eHeals | Slovenian     | Validating information (Cronbach alpha=.75), understanding information (Cronbach alpha=.81), awareness of sources (Cronbach alpha=.80), perceived efficiency (Cronbach alpha=.75), recognizing quality (Cronbach alpha=.52) and being smart on the net (Cronbach alpha=.70) | 6 dimensions (EFA and CFA)                                                                                                                        | 644 users (mean age 40 years)                                          | Random sample, MedOver Net users                                                | 5-point Likert scale (2 reverse questions), dimension 1: mean=3.80 SD=.61 dimension 2: mean=3.11 SD=.75, dimension 3: mean=3.98 SD=.67, dimension 4: mean=3.94 SD=.65, dimension 5: mean=3.84 SD=.80, dimension 6: mean=3.74, SD=0.78) |
| 23 | Aponte & Nokes, 2017 [66] | 10 items (+ focus groups), paper pencil administration                                                                            | To assess the internet use and eHealth literacy of older Hispanic with Diabetes 2         | Spanish (USA) | Cronbach alpha=.98                                                                                                                                                                                                                                                          | 1 factor (EFA)                                                                                                                                    | 20 Hispanic adults with Type 2 diabetes (mean age 74 years)            | Senior Center in East Harlem, Convenience Sample, Mixed method design           | 5-point Likert scale, range 8 to 40, Mean score=22.35 (SD= 12.96)                                                                                                                                                                      |
| 24 | Hyde et al, 2018 [62]     | 7 items scale (item 3 removed) (+ internet characteristics), elf-administered web based                                           | verify 3 factor model structure                                                           | English       | Factor 1: Composite reliability: .89, factor 2: .92 and factor 3 .89                                                                                                                                                                                                        | 3 factor structure: awareness (1,2), skills (3, 4,5) and evaluation (6, 7, 8) (CFA)                                                               | 256 MRI and CT outpatients                                             | convenient sample, MRI and CT outpatients                                       | 5-point Likert scale, no mean score available                                                                                                                                                                                          |
| 25 | Paige et al, 2018 [22]    | 8 items scale (+ health related internet use), web-based self-administered                                                        | invariance measurement, better model fit                                                  | English (US)  | Factor 1. Cronbach alpha =.84, Factor 2, Cronbach alpha=.88, Factor 3 Cronbach alpha=.84                                                                                                                                                                                    | 1-4 factors structure (CFA). Better fit=3 factor model: information awareness (1, 2), information seeking (3,4), information engagement (5,6,7,8) | 829 adults: millennials, generation X, baby boomers, silent generation | stratified by race (Caucasian, black/African)                                   | 5-point Likert scale, Factor 1 (mean =7.48 SD= 1.71), Factor 2 (mean 7.85 SD=1.51), Factor 3 (mean= 14.89 SD=2.88)                                                                                                                     |
| 26 | Gazibara et al, 2018 [29] | 8 items scale (+ age of 1st internet use), self-administered                                                                      | validate in Serbian and evaluate eHealth literacy                                         | Serbian       | Cronbach alpha=.85                                                                                                                                                                                                                                                          | 1st factor: Q1,2,3,4 and 2nd factor: Q 5,6,7,8 EFA                                                                                                | 702 students                                                           | 4 high schools in Belgrade (randomly selected)                                  | 5-point Likert scale, total score: 8 to 40, high and low scores, mean 26 (20-30)                                                                                                                                                       |
| 27 | Chang & Schulz 2018 [51]  | 8 items scale (+ 10 item scale of media and computer literacy and 9 items on the use of information), web based self administered | development of eHe Chinese                                                                | Chinese       | Cronbach alpha=.95                                                                                                                                                                                                                                                          | 1 factor (EFA and CFA)                                                                                                                            | 352 interviews                                                         | Convenient sample of Public Hospital, Ethnic minority of Han, mandarin speaking | 5-point Likert scale, mean score is estimated per group (age, sex, education, resident, occupation and income)                                                                                                                         |
| 28 | Chung et al, 2018 [64]    | 8 items scale (+ internet use behaviour), elf-administered web based                                                              | validation in Korean                                                                      | Korean        | CVI, Cronbach alpha. Scale CVI .83, item CVI >.67                                                                                                                                                                                                                           | 1 factor (EFA)                                                                                                                                    | 500 young adults from Korean internet survey panel                     | Korean internet survey panel                                                    | 5-point Likert scale, total score: 8 to 40, high and low scores, (mean 28.06 SD 4.81)                                                                                                                                                  |

a. PCA= Principal Component Analysis, b. CFA= Confirmatory Factor Analysis, c. EFA= Exploratory Factor Analysis, d. Qn= Question, e. IRT= Item Response Theory, f. PCM=Partial Credit Model, g. UK=United Kingdom, h. USA=United States of Amerika, i. CVI= Content Validity Index

This is a Multimedia Appendix to a full manuscript published in the J Med Internet Res. For full copyright and citation information see <http://dx.doi.org/10.2196/jmir.12504>
